# Supplementary material for: Fabrication of a reusable bifunctional biomimetic Ti4+-phosphorylated cellulose monolith with a coral-like structure for enrichment of phosphorylated and glycosylated peptides
Source: Royal Society of Chemistry journal article supplement (doi:10.1039/d1gc02206g), 2021-01-01
Supplement: d1gc02206g1.pdf [file d1gc02206g1.pdf]

**Fabrication of Reusable Bifunctional Biomimetic Ti<sup>4+</sup>-  
Phosphorylated Cellulose Monolith with Coral-Like Structure for  
Enrichment of Phosphorylated and Glycosylated Peptides**

Luwei Zhang<sup>a</sup>, Yan Wang<sup>a</sup>, Lei Pan<sup>b</sup>, Wenrui Wu<sup>b</sup>, Taka-Aki Asoh<sup>a,\*</sup>, Junjie Ou<sup>b</sup>,

Hiroshi Uyama<sup>a,\*</sup>

<sup>a</sup> Department of Applied Chemistry, Graduate School of Engineering, Osaka  
University, Suita 565-0871, Japan

<sup>b</sup> CAS Key Laboratory of Separation Science for Analytical Chemistry, Dalian  
Institute of Chemical Physics, Chinese Academy of Sciences, Dalian, 116023, China

\* To whom correspondence should be addressed:

Prof. Taka-Aki Asoh

Tel: +81-6-6879-7365

Fax: +81-6-6879-7367

E-mail: asoh@chem.eng.osaka-u.ac.jp

Prof. Hiroshi Uyama

Tel: +81-6-6879-7364

Fax: +81-6-6879-7367

E-mail: uyama@chem.eng.osaka-u.ac.jp

## **Mass spectrometry analysis**

MALDI-TOF MS experiments were carried out in positive ion mode on a Autoflex III (Bruker, Germany). The sample solution (0.5  $\mu\text{L}$ ) and 0.5  $\mu\text{L}$  DHB solution (25  $\text{mg}\cdot\text{mL}^{-1}$ , ACN/H<sub>2</sub>O/H<sub>3</sub>PO<sub>4</sub>, 70/29/1, v/v/v) were deposited in sequence on the MALDI plate for MS analysis.

The complete MS scan range was from  $m/z$  400 to 2,000 and was obtained by Orbitrap at 70,000 resolutions in the mass spectrometer. The 20 strongest multi-charged ions were fragmented by higher energy collision dissociation. The normalized HCD collision energy was set to 27%, and the spray voltage was set to 2 kV. The temperature of the heated capillary was set at 250 °C. All MS and MS/MS spectra were collected in the data-dependent acquisition mode by Xcalibur software.

## **Data search of phosphopeptides and glycopeptides**

The MS/MS spectra obtained were searched on the UniProt human database using the Mascot Daemon protein identification platform. The human database was downloaded from the website <http://www.uniprot.org/>. The obtained data were processed using ArMone v 2.0. The parent ion mass tolerance was set to 10 ppm and the fragment mass deviation was set to 0.05 Da. The enzyme specificity was selected as trypsin or elastase, and up to two missed digestion sites were allowed. The false discovery rate (FDR) was set at < 1%.

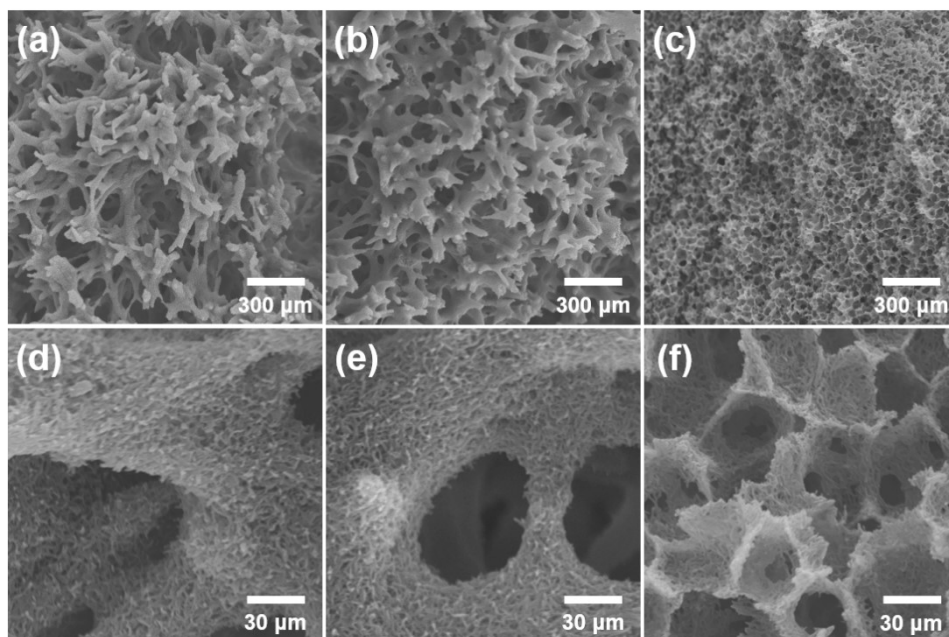

**Figure S1.** SEM images of (a, d) CM-1, (b, e) CM-2 and (c, f) CM-3 (at 500 ×, 5000 ×, 500 ×, 5000 ×, 5000 ×, 500 × and 5000 × magnification, respectively).

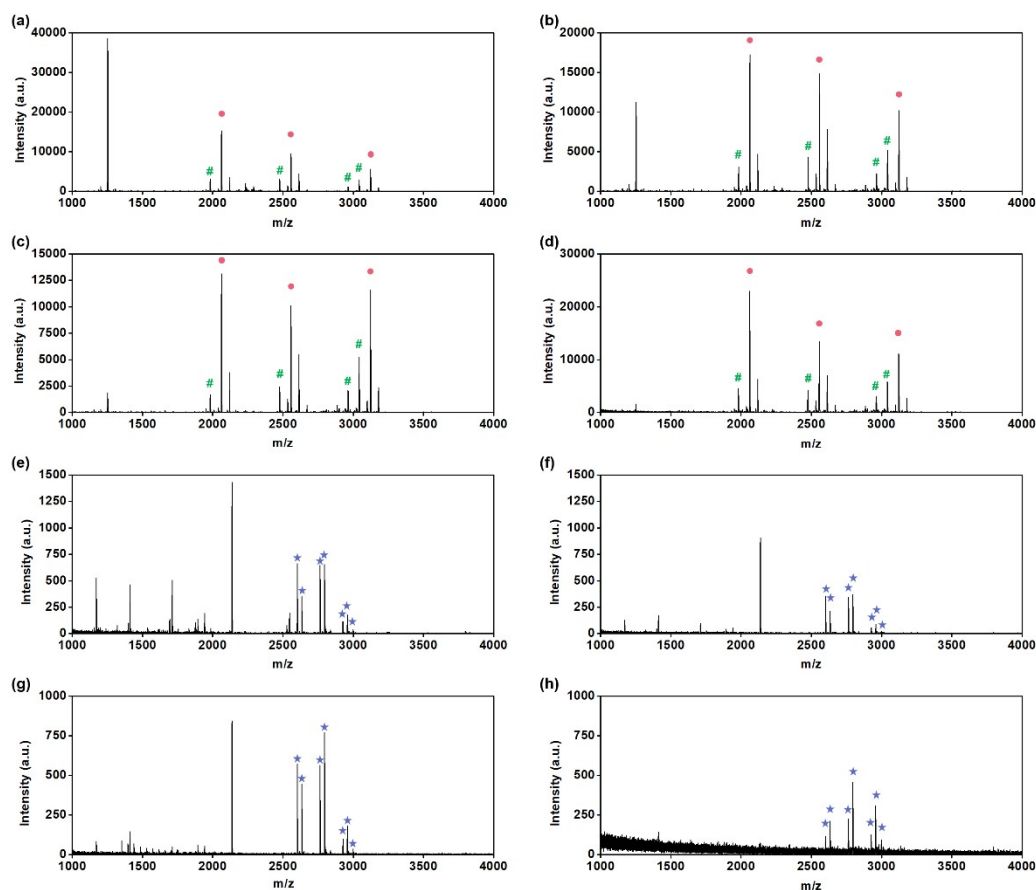

**Figure S2.** MALDI-TOF mass spectra of phosphopeptides from  $\beta$ -casein digest after enrichment by TiPCM with different ACN content. (a) 83% ACN + 3% TFA, (b) 81% ACN + 3% TFA, (c) 79% ACN + 3% TFA and (d) 77% ACN + 3% TFA. And MALDI-TOF mass spectra of glycopeptides from IgG digest after enrichment by TiPCM with different ACN content. (e) 83% ACN + 3% TFA, (f) 81% ACN + 3% TFA, (g) 79% ACN + 3% TFA and (h) 77% ACN + 3% TFA. Phosphopeptide peaks identified are marked with the symbol ●, dephosphorylated peptide peaks identified are marked with the symbol #, and glycopeptide peaks identified are marked with the symbol ★.

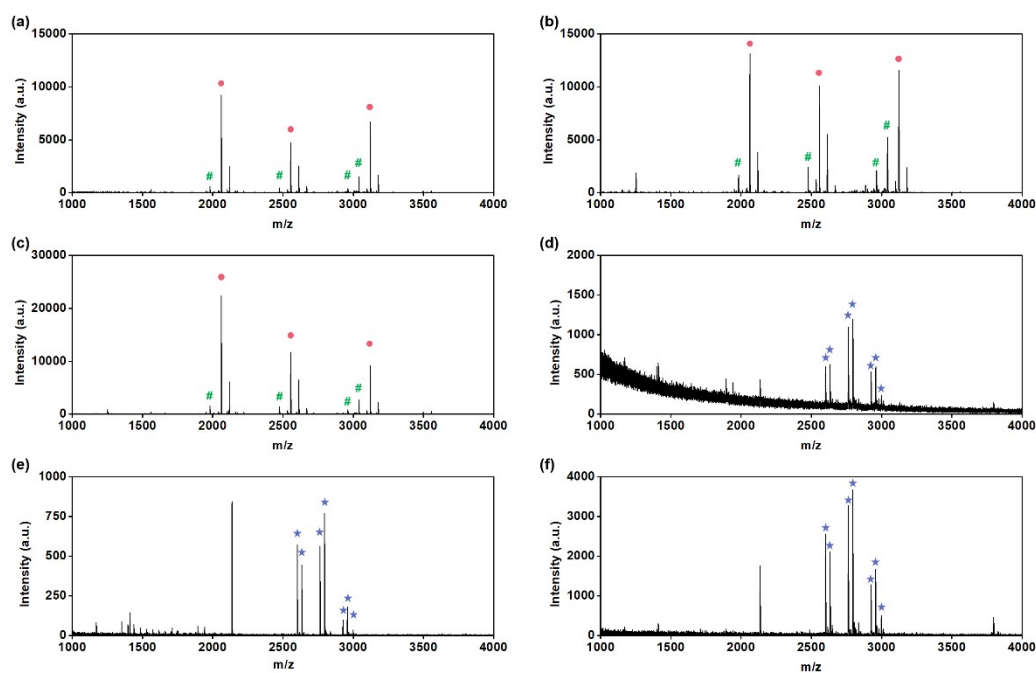

**Figure S3.** MALDI-TOF mass spectra of phosphopeptides from  $\beta$ -casein digest after enrichment by TiPCM with different TFA content. (a) 79% ACN + 1% TFA, (b) 79% ACN + 3% TFA and (c) 79% ACN + 5% TFA. And MALDI-TOF mass spectra of glycopeptides from IgG digest after enrichment by TiPCM with different TFA content. (d) 79% ACN + 1% TFA, (e) 79% ACN + 3% TFA and (f) 79% ACN + 5% TFA. Phosphopeptide peaks identified are marked with the symbol ●, dephosphorylated peptide peaks identified are marked with the symbol #, and glycopeptide peaks identified are marked with the symbol ★.

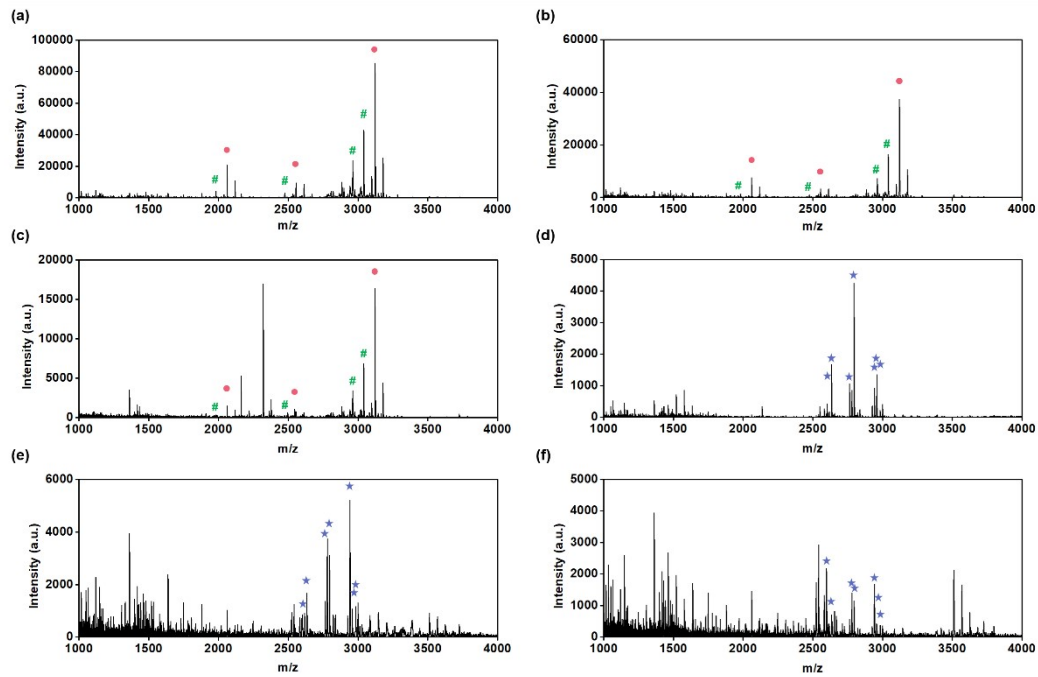

**Figure S4.** MALDI-TOF mass spectra of phosphopeptides from  $\beta$ -casein and BSA tryptic digest with molar ratios of (a) 1/500, (b) 1/1000 and (c) 1/5000 after enrichment by TiPCM. And MALDI-TOF mass spectra of glycopeptides from IgG and BSA tryptic digest with molar ratios of (d) 1/100, (e) 1/500 and (f) 1/1000 after enrichment by TiPCM. Phosphopeptide peaks identified are marked with the symbol ●, dephosphorylated peptide peaks identified are marked with the symbol #, and glycopeptide peaks identified are marked with the symbol ★.

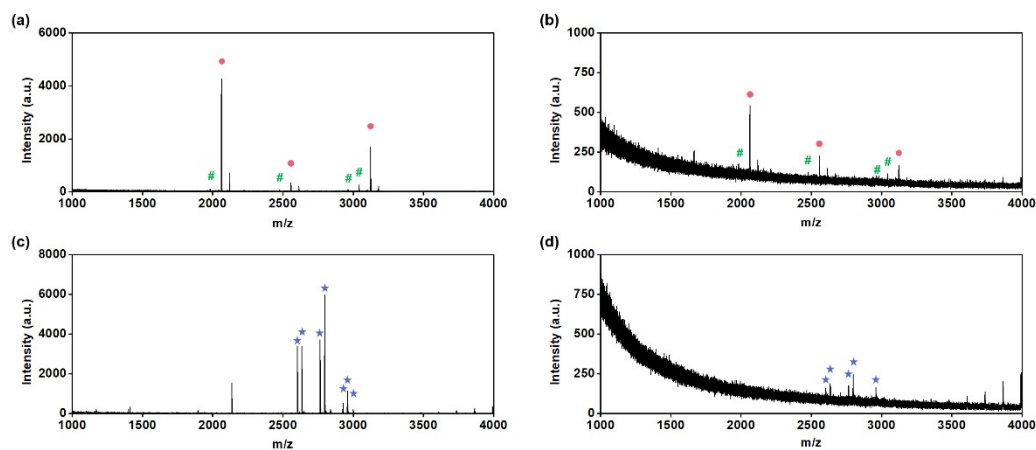

**Figure S5.** MALDI-TOF-MS spectra of (a) 50 and (b) 5 fmol of  $\beta$ -casein tryptic digest after enrichment by TiPCM. And MALDI-TOF-MS spectra of (c) 50 and (d) 5 fmol of IgG tryptic digest after enrichment by TiPCM. Phosphopeptide peaks identified are marked with the symbol ●, dephosphorylated peptide peaks identified are marked with the symbol #, and glycopeptide peaks identified are marked with the symbol ★.

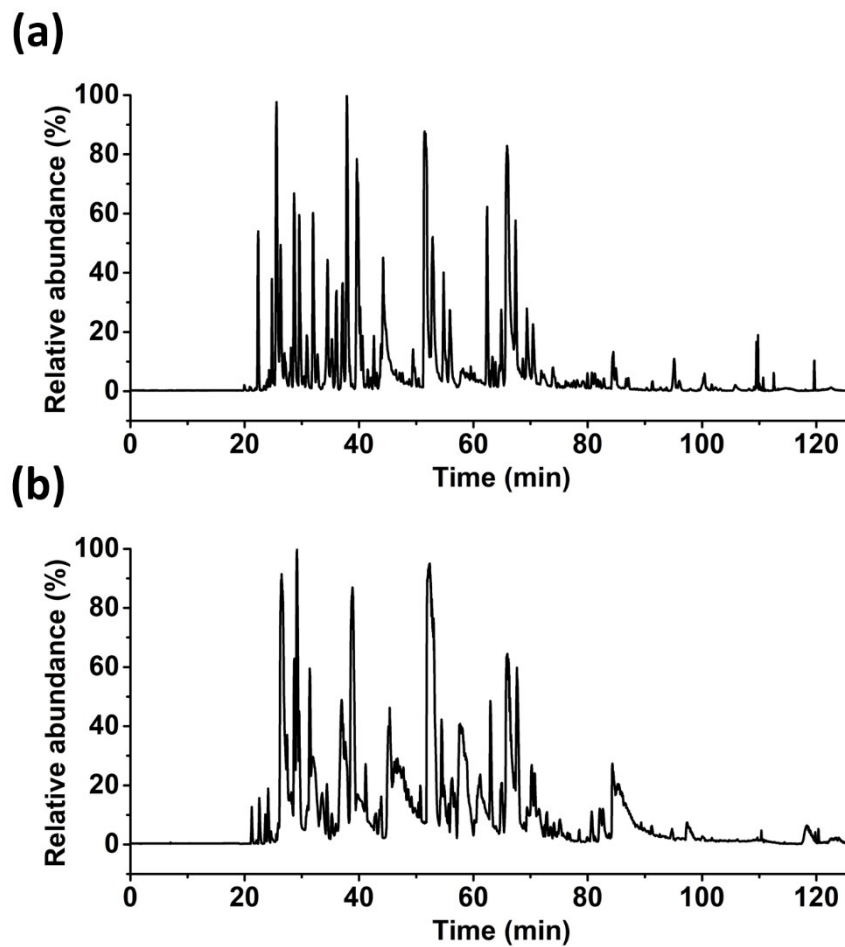

**Figure S6.** Chromatogram of tryptic digest of milk after enrichment with TiPCM by cLC-MS/MS, (a) glycopeptide and (b) phosphopeptides.



**Table S1.** Molecular masses and glycan composition of the glycopeptides from IgG tryptic digest after enrichment by TiPCM when 79% ACN + 3% TFA was used as loading solution.

| No. | Observed m/z | Glycan composites             | Peptide Sequence |
|-----|--------------|-------------------------------|------------------|
| 1   | 2237.177     | [Hex]2[HexNAc]3[Fuc]1         | EEQFNSTFR        |
| 2   | 2268.528     | [Hex]2[HexNAc]3[Fuc]1         | EEQYNSTYR        |
| 3   | 2399.887     | [Hex]3[HexNAc]3[Fuc]1         | EEQFNSTFR        |
| 4   | 2431.148     | [Hex]3[HexNAc]4               | EEQYNSTFR        |
| 5   | 2456.623     | [Hex]3[HexNAc]4               | EEQFNSTFR        |
| 6   | 2489.21      | [Hex]3[HexNAc]4               | EEQYNSTYR        |
| 7   | 2561.447     | [Hex]4[HexNAc]3[Fuc]1         | EEQFNSTFR        |
| 8   | 2594.275     | [Hex]4[HexNAc]3[Fuc]1         | EEQYNSTYR        |
| 9   | 2602.008     | [Hex]3[HexNAc]4[Fuc]1         | EEQFNSTFR        |
| 10  | 2619.067     | [Hex]3[HexNAc]4[Fuc]1         | EEQFNSTYR        |
| 11  | 2634.022     | [Hex]3[HexNAc]4[Fuc]1         | EEQYNSTYR        |
| 12  | 2650.955     | [Hex]4[HexNAc]4               | EEQYNSTYR        |
| 13  | 2660.785     | [Hex]3[HexNAc]5               | EEQFNSTFR        |
| 14  | 2763.861     | [Hex]4[HexNAc]4[Fuc]1         | EEQFNSTFR        |
| 15  | 2781.085     | [Hex]4[HexNAc]4[Fuc]1         | EEQYNSTFR        |
| 16  | 2796.044     | [Hex]4[HexNAc]4[Fuc]1[Na]1    | EEQYNSTYR        |
| 17  | 2806.939     | [Hex]3[HexNAc]5[Fuc]1         | EEQFNSTFR        |
| 18  | 2812.968     | [Hex]5[HexNAc]4               | EEQYNSTYR        |
| 19  | 2838.223     | [Hex]3[HexNAc]5[Fuc]1         | EEQYNSTYR        |
| 20  | 2853.347     | [Hex]4[HexNAc]5               | EEQYNSTYR        |
| 21  | 2925.811     | [Hex]5[HexNAc]4[Fuc]1         | EEQFNSTFR        |
| 22  | 2942.889     | [Hex]5[HexNAc]4[Fuc]1         | EEQFNSTYR        |
| 23  | 2958.013     | [Hex]5[HexNAc]4[Fuc]1         | EEQYNSTYR        |
| 24  | 2968.005     | [Hex]4[HexNAc]5[Fuc]1         | EEQFNSTFR        |
| 25  | 2982.18      | [Hex]5[HexNAc]4[Fuc]1[Na]1    | EEQYNSTYR        |
| 26  | 2998.87      | [Hex]4[HexNAc]5[Fuc]1         | EEQYNSTYR        |
| 27  | 3015.001     | [Hex]5[HexNAc]5               | EEQYNSTYR        |
| 28  | 3056.221     | [Hex]4[HexNAc]4[Fuc]1[NeuAc]1 | EEQFNSTFR        |
| 29  | 3084.293     | [Hex]5[HexNAc]4[Fuc]1         | EEQFNSTYR        |
| 30  | 3129.946     | [Hex]5[HexNAc]5[Fuc]1         | EEQFNSTFR        |
| 31  | 3218.684     | [Hex]5[HexNAc]4[Fuc]1[NeuAc]1 | EEQFNSTFR        |
| 32  | 3232.649     | [Hex]5[HexNAc]4[Fuc]1[NeuAc]1 | EEQYNSTFR        |
| 33  | 3251.084     | [Hex]5[HexNAc]4[Fuc]1[NeuAc]1 | EEQYNSTYR        |

**Table S2.** Molecular masses and peptides sequence from  $\beta$ -casein tryptic digest after enrichment by TiPCM when 79% CAN + 3% TFA was used as loading solution.

| No. | Observed <i>m/z</i> | Peptide Sequence      | Number of phosphoryl groups |
|-----|---------------------|-----------------------|-----------------------------|
| 1   | 2062.692            | FQEEQQQTEDELQDK       | 1                           |
| 2   | 2557.152            | FQEEQQQTEDELQDKIHPF   | 1                           |
| 3   | 3123.606            | RELEELNVPGEIVELEESITR | 4                           |

**Table S3.** Molecular masses and glycan composition of the glycopeptides from IgG and  $\beta$ -casein tryptic digest after enrichment by TiPCM when 79% CAN + 3% TFA was used as loading solution.

| No. | Observed <i>m/z</i> | Glycan composites          | Peptide Sequence |
|-----|---------------------|----------------------------|------------------|
| 1   | 2238.791            | [Hex]2[HexNAc]3[Fuc]1      | EEQFNSTFR        |
| 2   | 2269.57             | [Hex]2[HexNAc]3[Fuc]1      | EEQYNSTYR        |
| 3   | 2398.816            | [Hex]3[HexNAc]3[Fuc]1      | EEQFNSTFR        |
| 4   | 2431.881            | [Hex]3[HexNAc]4            | EEQYNSTFR        |
| 5   | 2456.753            | [Hex]3[HexNAc]4            | EEQFNSTFR        |
| 6   | 2488.774            | [Hex]3[HexNAc]4            | EEQYNSTYR        |
| 7   | 2533.538            | [Hex]6[HexNAc]2            | EEQFNSTFR        |
| 8   | 2601.81             | [Hex]3[HexNAc]4[Fuc]1      | EEQFNSTFR        |
| 9   | 2633.792            | [Hex]3[HexNAc]4[Fuc]1      | EEQYNSTYR        |
| 10  | 2649.78             | [Hex]4[HexNAc]4            | EEQYNSTYR        |
| 11  | 2779.932            | [Hex]4[HexNAc]4[Fuc]1      | EEQYNSTFR        |
| 12  | 2795.817            | [Hex]4[HexNAc]4[Fuc]1[Na]1 | EEQYNSTYR        |
| 13  | 2805.872            | [Hex]3[HexNAc]5[Fuc]1      | EEQFNSTFR        |
| 14  | 2811.805            | [Hex]5[HexNAc]4            | EEQYNSTYR        |
| 15  | 2837.804            | [Hex]3[HexNAc]5[Fuc]1      | EEQYNSTYR        |
| 16  | 2853.019            | [Hex]4[HexNAc]5            | EEQYNSTYR        |
| 17  | 2925.875            | [Hex]5[HexNAc]4[Fuc]1      | EEQFNSTFR        |
| 18  | 2943.079            | [Hex]5[HexNAc]4[Fuc]1      | EEQFNSTYR        |
| 19  | 2957.904            | [Hex]5[HexNAc]4[Fuc]1      | EEQYNSTYR        |
| 20  | 2982.801            | [Hex]5[HexNAc]4[Fuc]1[Na]1 | EEQYNSTYR        |
| 21  | 2998.894            | [Hex]4[HexNAc]5[Fuc]1      | EEQYNSTYR        |

|    |          |                               |           |
|----|----------|-------------------------------|-----------|
| 22 | 3015.098 | [Hex]5[HexNAc]5               | EEQYNSTYR |
| 23 | 3056.772 | [Hex]4[HexNAc]4[Fuc]1[NeuAc]1 | EEQFNSTFR |
| 24 | 3084.923 | [Hex]5[HexNAc]4[Fuc]1         | EEQFNSTYR |
| 25 | 3160.875 | [Hex]5[HexNAc]5[Fuc]1         | EEQYNSTYR |
| 26 | 3178.965 | [Hex]6[HexNAc]3[Fuc]1[NeuAc]1 | EEQFNSTFR |
| 27 | 3217.738 | [Hex]5[HexNAc]4[Fuc]1[NeuAc]1 | EEQFNSTFR |
| 28 | 3235.928 | [Hex]5[HexNAc]4[Fuc]1[NeuAc]1 | EEQYNSTFR |
| 29 | 3250.784 | [Hex]5[HexNAc]4[Fuc]1[NeuAc]1 | EEQYNSTYR |
| 30 | 3542.327 | [Hex]5[HexNAc]4[Fuc]1[NeuAc]2 | EEQYNSTYR |

  

| No. | Observed m/z | Peptide Sequence      | Number of phosphoryl groups |
|-----|--------------|-----------------------|-----------------------------|
| 1   | 2061.675     | FQEEQQQTEDELQDK       | 1                           |
| 2   | 2555.889     | FQEEQQQTEDELQDKIHFP   | 1                           |
| 3   | 3121.896     | RELEELNVPGEIVELEESITR | 4                           |

**Table S4.** Molecular masses and glycan composition of the glycopeptides from IgG and BSA tryptic digest with the molar ratio of 1/100 after enrichment by TiPCM.

| No. | Observed <i>m/z</i> | Glycan composites          | Peptide Sequence |
|-----|---------------------|----------------------------|------------------|
| 1   | 2432.634            | [Hex]3[HexNAc]4            | EEQYNSTFR        |
| 2   | 2448.804            | [Hex]4[HexNAc]3            | EEQYNSTYR        |
| 3   | 2488.808            | [Hex]3[HexNAc]4            | EEQYNSTYR        |
| 4   | 2537.991            | [Hex]6[HexNAc]2            | EEQFNSTFR        |
| 5   | 2594.917            | [Hex]4[HexNAc]3[Fuc]1      | EEQYNSTYR        |
| 6   | 2602.837            | [Hex]3[HexNAc]4[Fuc]1      | EEQFNSTFR        |
| 7   | 2619.853            | [Hex]3[HexNAc]4[Fuc]1      | EEQFNSTYR        |
| 8   | 2634.836            | [Hex]3[HexNAc]4[Fuc]1      | EEQYNSTYR        |
| 9   | 2657.119            | [Hex]3[HexNAc]5            | EEQFNSTFR        |
| 10  | 2780.908            | [Hex]4[HexNAc]4[Fuc]1      | EEQYNSTFR        |
| 11  | 2796.92             | [Hex]4[HexNAc]4[Fuc]1[Na]1 | EEQYNSTYR        |
| 12  | 2806.825            | [Hex]3[HexNAc]5[Fuc]1      | EEQFNSTFR        |
| 13  | 2813.97             | [Hex]5[HexNAc]4            | EEQYNSTYR        |
| 14  | 2838.769            | [Hex]3[HexNAc]5[Fuc]1      | EEQYNSTYR        |
| 15  | 2855.066            | [Hex]4[HexNAc]5            | EEQYNSTYR        |
| 16  | 2927.033            | [Hex]5[HexNAc]4[Fuc]1      | EEQFNSTFR        |
| 17  | 2942.803            | [Hex]5[HexNAc]4[Fuc]1      | EEQFNSTYR        |
| 18  | 2959.017            | [Hex]5[HexNAc]4[Fuc]1      | EEQYNSTYR        |
| 19  | 2985.209            | [Hex]5[HexNAc]4[Fuc]1[Na]1 | EEQYNSTYR        |
| 20  | 3000.047            | [Hex]4[HexNAc]5[Fuc]1      | EEQYNSTYR        |

|    |          |                                    |           |
|----|----------|------------------------------------|-----------|
| 21 | 3015.17  | [Hex]5[HexNAc]5                    | EEQYNSTYR |
| 22 | 3131.071 | [Hex]5[HexNAc]5[Fuc]1              | EEQFNSTFR |
| 23 | 3209.321 | [Hex]6[HexNAc]3[Fuc]1[NeuAc]1      | EEQYNSTYR |
| 24 | 3251.053 | [Hex]5[HexNAc]4[Fuc]1[NeuAc]1      | EEQYNSTYR |
| 25 | 3263.99  | [Hex]5[HexNAc]4[NeuAc]1            | EEQYNSTYR |
| 26 | 3269.442 | [Hex]5[HexNAc]4[Fuc]1[NeuAc]1[Na]1 | EEQYNSTYR |

**Table S5.** Molecular masses and glycan composition of the glycopeptides from IgG and BSA tryptic digest with the molar ratio of 1/500 after enrichment by TiPCM.

| No. | Observed <i>m/z</i> | Glycan composites             | Peptide Sequence |
|-----|---------------------|-------------------------------|------------------|
| 1   | 2399.287            | [Hex]3[HexNAc]3[Fuc]1         | EEQFNSTFR        |
| 2   | 2603.285            | [Hex]3[HexNAc]4[Fuc]1         | EEQFNSTFR        |
| 3   | 2619.336            | [Hex]3[HexNAc]4[Fuc]1         | EEQFNSTYR        |
| 4   | 2635.301            | [Hex]3[HexNAc]4[Fuc]1         | EEQYNSTYR        |
| 5   | 2765.327            | [Hex]4[HexNAc]4[Fuc]1         | EEQFNSTFR        |
| 6   | 2780.374            | [Hex]4[HexNAc]4[Fuc]1         | EEQYNSTFR        |
| 7   | 2796.365            | [Hex]4[HexNAc]4[Fuc]1[Na]1    | EEQYNSTYR        |
| 8   | 2838.363            | [Hex]3[HexNAc]5[Fuc]1         | EEQYNSTYR        |
| 9   | 2854.796            | [Hex]4[HexNAc]5               | EEQYNSTYR        |
| 10  | 2925.258            | [Hex]5[HexNAc]4[Fuc]1         | EEQFNSTFR        |
| 11  | 2942.365            | [Hex]5[HexNAc]4[Fuc]1         | EEQFNSTYR        |
| 12  | 2959.383            | [Hex]5[HexNAc]4[Fuc]1         | EEQYNSTYR        |
| 13  | 2985.43             | [Hex]5[HexNAc]4[Fuc]1[Na]1    | EEQYNSTYR        |
| 14  | 3001.276            | [Hex]4[HexNAc]5[Fuc]1         | EEQYNSTYR        |
| 15  | 3015.53             | [Hex]5[HexNAc]5               | EEQYNSTYR        |
| 16  | 3130.24             | [Hex]5[HexNAc]5[Fuc]1         | EEQFNSTFR        |
| 17  | 3207.425            | [Hex]6[HexNAc]3[Fuc]1[NeuAc]1 | EEQYNSTYR        |
| 18  | 3249.587            | [Hex]5[HexNAc]4[Fuc]1[NeuAc]1 | EEQYNSTYR        |
| 19  | 3266.319            | [Hex]5[HexNAc]4[NeuAc]1       | EEQYNSTYR        |
| 20  | 3441.854            | [Hex]5[HexNAc]4[Fuc]1         | TKPREEQYNSTYR    |

**Table S6.** Molecular masses and glycan composition of the glycopeptides from IgG and BSA tryptic digest with the molar ratio of 1/1000 after enrichment by TiPCM.

| No. | Observed <i>m/z</i> | Glycan composites     | Peptide Sequence |
|-----|---------------------|-----------------------|------------------|
| 1   | 2399.244            | [Hex]3[HexNAc]3[Fuc]1 | EEQFNSTFR        |
| 2   | 2601.365            | [Hex]3[HexNAc]4[Fuc]1 | EEQFNSTFR        |
| 3   | 2616.113            | [Hex]3[HexNAc]4[Fuc]1 | EEQFNSTYR        |
| 4   | 2635.212            | [Hex]3[HexNAc]4[Fuc]1 | EEQYNSTYR        |

|    |          |                            |           |
|----|----------|----------------------------|-----------|
| 5  | 2657.401 | [Hex]3[HexNAc]5            | EEQFNSTFR |
| 6  | 2765.327 | [Hex]4[HexNAc]4[Fuc]1      | EEQFNSTFR |
| 7  | 2780.365 | [Hex]4[HexNAc]4[Fuc]1      | EEQYNSTFR |
| 8  | 2796.336 | [Hex]4[HexNAc]4[Fuc]1[Na]1 | EEQYNSTYR |
| 9  | 2853.347 | [Hex]4[HexNAc]5            | EEQYNSTYR |
| 10 | 2927.293 | [Hex]5[HexNAc]4[Fuc]1      | EEQFNSTFR |
| 11 | 2942.434 | [Hex]5[HexNAc]4[Fuc]1      | EEQFNSTYR |
| 12 | 2959.288 | [Hex]5[HexNAc]4[Fuc]1      | EEQYNSTYR |
| 13 | 2986.625 | [Hex]5[HexNAc]4[Fuc]1[Na]1 | EEQYNSTYR |
| 14 | 3000.365 | [Hex]4[HexNAc]5[Fuc]1      | EEQYNSTYR |
| 15 | 3013.416 | [Hex]5[HexNAc]5            | EEQYNSTYR |
| 16 | 3084.39  | [Hex]5[HexNAc]4[Fuc]1      | EEQFNSTYR |
| 17 | 3127.45  | [Hex]5[HexNAc]5[Fuc]1      | EEQFNSTFR |

**Table S7.** Molecular masses and glycan composition of the glycopeptides from 50 fmol IgG tryptic digest after enrichment by TiPCM.

| No. | Observed <i>m/z</i> | Glycan composites                  | Peptide Sequence |
|-----|---------------------|------------------------------------|------------------|
| 1   | 2234.083            | [Hex]2[HexNAc]3[Fuc]1              | EEQFNSTFR        |
| 2   | 2458.384            | [Hex]3[HexNAc]4                    | EEQFNSTFR        |
| 3   | 2486.32             | [Hex]3[HexNAc]4                    | EEQYNSTYR        |
| 4   | 2603.346            | [Hex]3[HexNAc]4[Fuc]1              | EEQFNSTFR        |
| 5   | 2620.48             | [Hex]3[HexNAc]4[Fuc]1              | EEQFNSTYR        |
| 6   | 2635.35             | [Hex]3[HexNAc]4[Fuc]1              | EEQYNSTYR        |
| 7   | 2652.385            | [Hex]4[HexNAc]4                    | EEQYNSTYR        |
| 8   | 2765.476            | [Hex]4[HexNAc]4[Fuc]1              | EEQFNSTFR        |
| 9   | 2782.721            | [Hex]4[HexNAc]4[Fuc]1              | EEQYNSTFR        |
| 10  | 2797.472            | [Hex]4[HexNAc]4[Fuc]1[Na]1         | EEQYNSTYR        |
| 11  | 2807.474            | [Hex]3[HexNAc]5[Fuc]1              | EEQFNSTFR        |
| 12  | 2813.273            | [Hex]5[HexNAc]4                    | EEQYNSTYR        |
| 13  | 2838.57             | [Hex]3[HexNAc]5[Fuc]1              | EEQYNSTYR        |
| 14  | 2927.588            | [Hex]5[HexNAc]4[Fuc]1              | EEQFNSTFR        |
| 15  | 2941.759            | [Hex]5[HexNAc]4[Fuc]1              | EEQFNSTYR        |
| 16  | 2959.597            | [Hex]5[HexNAc]4[Fuc]1              | EEQYNSTYR        |
| 17  | 2969.498            | [Hex]4[HexNAc]5[Fuc]1              | EEQFNSTFR        |
| 18  | 2984.301            | [Hex]5[HexNAc]4[Fuc]1[Na]1         | EEQYNSTYR        |
| 19  | 3000.638            | [Hex]4[HexNAc]5[Fuc]1              | EEQYNSTYR        |
| 20  | 3015.843            | [Hex]5[HexNAc]5                    | EEQYNSTYR        |
| 21  | 3055.624            | [Hex]4[HexNAc]4[Fuc]1[NeuAc]1      | EEQFNSTFR        |
| 22  | 3250.554            | [Hex]5[HexNAc]4[Fuc]1[NeuAc]1      | EEQYNSTYR        |
| 23  | 3270.944            | [Hex]5[HexNAc]4[Fuc]1[NeuAc]1[Na]1 | EEQYNSTYR        |

**Table S8.** Molecular masses and glycan composition of the glycopeptides from 5 fmol IgG tryptic digest after enrichment by TiPCM.

| No. | Observed <i>m/z</i> | Glycan composites          | Peptide Sequence |
|-----|---------------------|----------------------------|------------------|
| 1   | 2487.63             | [Hex]3[HexNAc]4            | EEQYNSTYR        |
| 2   | 2536.184            | [Hex]6[HexNAc]2            | EEQFNSTFR        |
| 3   | 2604.421            | [Hex]3[HexNAc]4[Fuc]1      | EEQFNSTFR        |
| 4   | 2618.912            | [Hex]3[HexNAc]4[Fuc]1      | EEQFNSTYR        |
| 5   | 2635.689            | [Hex]3[HexNAc]4[Fuc]1      | EEQYNSTYR        |
| 6   | 2658.112            | [Hex]3[HexNAc]5            | EEQFNSTFR        |
| 7   | 2781.704            | [Hex]4[HexNAc]4[Fuc]1      | EEQYNSTFR        |
| 8   | 2798.577            | [Hex]4[HexNAc]4[Fuc]1[Na]1 | EEQYNSTYR        |
| 9   | 2839.468            | [Hex]3[HexNAc]5[Fuc]1      | EEQYNSTYR        |
| 10  | 2855.206            | [Hex]4[HexNAc]5            | EEQYNSTYR        |
| 11  | 2927.488            | [Hex]5[HexNAc]4[Fuc]1      | EEQFNSTFR        |
| 12  | 2960.586            | [Hex]5[HexNAc]4[Fuc]1      | EEQYNSTYR        |
| 13  | 3001.297            | [Hex]4[HexNAc]5[Fuc]1      | EEQYNSTYR        |
| 14  | 3017.669            | [Hex]5[HexNAc]5            | EEQYNSTYR        |
| 15  | 3127.741            | [Hex]5[HexNAc]5[Fuc]1      | EEQFNSTFR        |

**Table S9.** Glycopeptides identified from milk tryptic digest after enrichment by TiPCM.

| Site | Protein | Modified Sequence                   |
|------|---------|-------------------------------------|
| N120 | F1N726  | R.CQTSAPLWLN*GTHPGLGEGIVN*R.T       |
| N132 | F1N726  | R.CQTSAPLWLN*GTHPGLGEGIVN*R.T       |
| N63  | F1N726  | K.DLDCGAPGTPEAQLCFDPCQN*YTLNNEPFR.S |
| N257 | F1N726  | R.DGNWN*CSSLR.Q                     |
| N252 | B9VPZ5  | K.ADRDQYELLCLN*NSR.A                |
| N564 | B9VPZ5  | K.N*DTVWENTNGESTADWAK.N             |
| N93  | B6V3I5  | K.DDQNPSSNICN*ISCDK.F               |
| N231 | F1MXX6  | K.IFIGNVN*N*SGLK.I                  |
| N55  | E1BHI7  | R.LSPN*VSAK.G                       |
| N215 | E1BHI7  | K.N*VSCCIR.N                        |
| N83  | G3MXZ0  | K.IVGYLDEEGVLDQN*R.S                |
| N229 | G3MXZ0  | K.KPSPCEFIN*TTAR.V                  |
| N320 | G3MXZ0  | K.WIPPYQGYN*NSVDPR.I                |
| N468 | P81265  | K.N*VTAWLGEPLK.L                    |
| N95  | P80195  | R.N*ATLGSEETTEHTPSDASTTEGK.L        |
| N321 | P26201  | K.N*CTLYGVLDIGK.C                   |
| N79  | P26201  | R.QFWIFDVQNPDEVTVN*SSK.I            |

|      |            |                                       |
|------|------------|---------------------------------------|
| N172 | P26201     | K.SSM#FQN*R.T                         |
| N417 | P26201     | K.HNYIVPILWLN*ETGTIGDEK.A             |
| N30  | E1BGW1     | K.TN*TTESTAEDLK.T                     |
| N44  | E1BGW1     | K.TM#EN*QSVPLESK.A                    |
| N221 | E1BGW1     | K.IFPN*TSDPQEENR.N                    |
| N71  | E1BGW1     | K.ASN*FSFEDPSN*K.T                    |
| N79  | E1BGW1     | K.ASN*FSFEDPSN*K.T                    |
| N54  | E1BGW1     | K.AN*LTSDKENR.E                       |
| N444 | G5E513     | K.STGKPTLYN*VSLVLSDTASTCY.-           |
| N48  | G5E513     | K.FNN*STVSSER.F                       |
| N47  | G5E513     | K.FN*NSTVSSER.F                       |
| N283 | G5E513     | R.HLN*DTFSAR.G                        |
| N307 | F1N6D4     | K.TFTN*VTER.N                         |
| N294 | F1N6D4     | K.SILNQ*IAMNDESVQN*K.S                |
| N80  | P17697     | K.EDALN*DTR.D                         |
| N320 | P17697     | R.QQLN*ASLQLAEK.F                     |
| N346 | P17697     | K.MLN*TSALLK.Q                        |
| N68  | P02702     | K.NACCSVN*TSIEAHK.D                   |
| N160 | P02702     | K.GWN*WTSGYNQCPVK.A                   |
| N97  | F1N514     | K.IFIQDVN*CN*GTEDELIECDR.V            |
| N269 | F1N514     | K.AGWN*LSAAK.V                        |
| N510 | G3N2D8     | R.LHNQLLPN*TTVLEK.G                   |
| N336 | G3N2D8     | K.FVN*VTEVVR.N                        |
| N362 | E1BHY6     | K.APAHLSLLDLGAVEGDVPCDN*VTSCPSSTCCR.L |
| N260 | E1BHY6     | K.EN*ATDLLTK.L                        |
| N73  | P11151     | R.TPEDTAEDTCHLIPGVTESVANCHFN*HSSK.T   |
| N318 | A2I7N0     | K.SNYELN*DTLSQMGIK.K                  |
| N230 | A2I7N0     | K.HTEQAEFHVSDN*K.T                    |
| N174 | G3N0V0     | R.EEQFN*STYR.V                        |
| N216 | A0A140T8C6 | R.TN*STFVEALVDHAK.E                   |
| N336 | A0A140T8C6 | K.LIDNN*RTEEEILHALDK.V                |
| N101 | A0A140T8C6 | R.TCDWLPKPN*MSASCK.E                  |
| N221 | A0A0A0MPA0 | K.TPFNPN*HTYESEFHVSKN*ER.V            |
| N344 | G3X6M9     | K.N*HTLEVSAPQK.D                      |
| N246 | G3X6M9     | R.GTAN*LSETIR.V                       |
| N499 | Q29451     | K.LN*ISICPLTQTAER.F                   |
| N369 | Q29451     | K.AN*LSWSVK.K                         |
| N78  | B1H0W7     | K.SVVAPAADGGLN*LTSTFLR.K              |
| N51  | B1H0W7     | R.WFTSGLASN*SSWFLEK.K                 |
| N596 | E1B748     | K.EN*GTDTVQEEEEGPAEGSK.D              |
| N515 | E1B748     | R.VFGSQN*LTTVK.L                      |
| N188 | Q3SZV7     | R.SWPAVGN*CSSAIR.W                    |
| N218 | Q3SZV7     | R.FDPVTGEVN*STYPR.D                   |
| N109 | F1MUL0     | K.SDAVLGN*YTCEVTELSR.E                |

|       |            |                                         |
|-------|------------|-----------------------------------------|
| N50   | F1MUL0     | K.N*ITELYVR.W                           |
| N642  | F1MGR1     | R.N*TTNVVSCCQGLLSSAVVK.G                |
| N384  | Q8WML4     | R.ITNLQFN*SLENPQTSYYQELQR.S             |
| N177  | F1MX65     | R.YHSQTYGN*GSK.C                        |
| N71   | Q3SYR8     | R.EN*ISDPTSPM#R.T                       |
| N92   | G3N342     | R.VLHAETNSNLN*K.T                       |
| N103  | A0A0A0MP89 | K.FN*LTETPER.E                          |
| N1325 | E1BH06     | K.GLN*VTLSSLGR.S                        |
| N136  | Q3SZR3     | R.TFMLAASWN*GTK.N                       |
| N83   | G3MZC1     | K.LDN*YSTQELGK.T                        |
| N337  | F1MPE1     | R.N*ASSNVFFK.Q                          |
| N602  | Q28065     | K.N*VTCDFNPE.-                          |
| N271  | A6QP79     | K.VQSLQTLAAN*NSALAK.A                   |
| N677  | G8JKZ1     | R.VAPSESQ*N*CSFSLADKN*ITHGFLYPPAN*N*R.T |
| N686  | G8JKZ1     | R.VAPSESQ*N*CSFSLADKN*ITHGFLYPPAN*N*R.T |
| N698  | G8JKZ1     | R.VAPSESQ*N*CSFSLADKN*ITHGFLYPPAN*N*R.T |
| N100  | A2I7M9     | K.FN*LTEIQEK.E                          |
| N140  | P09487     | R.SQCN*TTQGNEVTSILR.W                   |
| N152  | Q2KIU3     | K.N*DTQILEK.E                           |
| N155  | Q9MZ06     | K.LVN*STLIR.I                           |
| N3763 | F1MER7     | R.SLTQGS LIVGSLAPVN*GTSQ GK.F           |
| N146  | Q5E9E3     | K.VITNQENVYQN*NTGR.F                    |
| N238  | F1MGK8     | K.N*FSCETQDLK.T                         |
| N60   | F1MLR4     | R.VN*GTDLAPDLLN*GSQVLVR.S               |
| N70   | F1MLR4     | R.VN*GTDLAPDLLN*GSQVLVR.S               |
| N98   | F1MS32     | R.ADGTVNQIEGEATPEN*ITEPAK.L             |
| N253  | A0A140T843 | K.FGN*WSAQPSCK.A                        |
| N108  | A0A140T8A8 | R.SN*DTLYIPDWEGR.A                      |
| N72   | A6QPK0     | K.QCFLQQSN*ETLANFK.Q                    |
| N288  | P50291     | K.SEEPVCASDN*ATYASECAMK.E               |
| N103  | E1BJ49     | R.APGN*DTFYSPGSSLDVTFR.S                |
| N1394 | F1MD77     | R.IPAIN*QTIEANEK.T                      |
| N219  | F1N1G1     | K.NYN*ISWELGNPNFSQR.K                   |
| N122  | P81187     | R.AAYYN*LSDEISFR.C                      |
| N33   | Q3ZBS7     | R.CTEGFN*ATR.K                          |
| N96   | Q2YDH0     | K.SYCSDN*STAGDCK.V                      |
| N208  | F1MMD7     | K.LAEALTTSQN*K.T                        |
| N217  | F1MX50     | K.IVTPAEYYN*ATSQ.-                      |
| N1087 | F1MRA6     | K.N*GTQLQN*FTLDR.N                      |
| N1093 | F1MRA6     | K.N*GTQLQN*FTLDR.N                      |
| N514  | G3X6N3     | R.N*SSLCALCIGSEK.G                      |
| N114  | F1N720     | R.LSN*LSSSWFR.S                         |
| N90   | P08037     | R.GVAPPPLQN*SSKPR.S                     |
| N398  | F1MAV0     | K.GTAGNALIEGASQLVGEN*R.T                |



|      |            |                                      |
|------|------------|--------------------------------------|
| N125 | A7E3W2     | K.DASVICTN*ETR.G                     |
| N182 | Q2KJF1     | R.AGN*YSCSYR.T                       |
| N199 | A5D7E6     | K.GFCEVPFGN*K.T                      |
| N211 | F1N726     | R.QDLN*VSDVHSLQPQLDCGDTEIK.V         |
| N252 | B9VPZ5     | K.ADRDQYELLCLN*N*SR.A                |
| N79  | E1BGW1     | K.ASNFSFEDPSN*K.T                    |
| N212 | P80025     | K.IVGYLDEEGVLDQN*R.S                 |
| N106 | P80025     | R.DTTLTN*VTDPSLTLALSWEVGCAPVPLVK.C   |
| N358 | P80025     | K.KPSPCEFIN*TTAR.V                   |
| N449 | P80025     | K.WIPPYQGYN*NSVDPR.I                 |
| N47  | G5E513     | K.FN*N*STVSSER.F                     |
| N73  | P11151     | R.TPEDTAEDTCHLIPGVTESVAN*CHFV*HSSK.T |
| N101 | A0A140T8C6 | R.TCDWLPKPN*M#SASCK.E                |
| N97  | F1N514     | K.IFIQDVNCN*GTEDELIECDR.V            |
| N94  | Q3SZR3     | K.CVYN*CSFIK.I                       |
| N221 | A0A0A0MP92 | K.TPFNPN*HTYESEFHVSQNER.V            |
| N386 | A6QP79     | K.HTDDLTSLN*NTLANIR.L                |
| N677 | G8JKZ1     | R.VAPSESN*CSFSLADK.N                 |
| N698 | G8JKZ1     | K.NITHGFLYPPANN*R.T                  |
| N152 | Q3ZBX0     | K.ESESGDQVITN*STQSK.F                |
| N86  | E1B6Z6     | K.EDGSYN*VTSILLK.D                   |
| N234 | F1MAU4     | K.IVTTDFSQSGPN*CSSESIR.R             |
| N256 | E1BNR9     | R.EDN*PDKNPEAPLN*VSR.V               |
| N503 | A6QM01     | R.SVYN*CSGEECR.G                     |
| N331 | F1MJM4     | R.NPPGLISAGN*ATGK.T                  |
| N138 | F1N076     | K.EHEGAIYPDN*TTDFQK.A                |
| N225 | F1MSZ6     | R.LTINQWISN*K.T                      |
| N87  | E1BJ75     | R.N*CSAAPQPEPTAGLAR.Y                |
| N195 | F1MVJ8     | R.N*MTLLVEQLETLDK.N                  |
| N307 | F1MNJ2     | R.QLQ*DLDCSSSDDEGAAQ*N*STKPSATK.G    |
| N156 | B0JYN6     | K.LCPDCPLLAPLN*DSR.V                 |
| N282 | A6QNL0     | R.SLN*LSFAGLEQVPK.G                  |
| N184 | Q2TBX4     | R.N*STIQAANLAGLK.I                   |
| N130 | B0JYM4     | K.DN*QTASILDK.M                      |
| N87  | A0A140T8C8 | K.EGDCPFQSN*K.T                      |
| N564 | B9VPZ5     | K.N*DTVWEN*TNGESTADWAK.N             |
| N97  | P17697     | K.ASQGVCN*ETMTALWEECKPCLK.Q          |
| N346 | P17697     | K.M#LN*TSALLK.Q                      |
| N231 | F1MXX6     | K.IFIGNVN*NSGLK.I                    |
| N294 | F1N6D4     | K.SILNQIAMNDESVQN*K.S                |
| N318 | A2I7N0     | K.SNYELN*DTLSQM#GIK.K                |
| N87  | A0JNP2     | K.ILLN*CTVTDVK.A                     |
| N130 | B0JYM4     | K.NYPKDN*QTASILDK.M                  |
| N147 | A0A140T891 | K.SCN*ASDPQCPPDGR.Y                  |

|       |            |                                 |
|-------|------------|---------------------------------|
| N493  | E1BNX4     | K.DVGGN*STGPDFSHPK.E            |
| N221  | A0A0A0MP92 | K.TPFN*PN*HTYESEFHVSQN*ER.V     |
| N118  | F1MPE1     | R.AQDEILFSN*STR.L               |
| N792  | A5D7C4     | R.DAN*CSVM#R.F                  |
| N170  | G3N2K4     | K.LN*LTTDPK.F                   |
| N1348 | F1MNT4     | R.VN*ASTTSSN*STVEESALTR.D       |
| N1355 | F1MNT4     | R.VN*ASTTSSN*STVEESALTR.D       |
| N132  | F1MJM4     | R.FN*DTEVLQR.L                  |
| N48   | Q3ZC83     | R.LDMSQN*MSLGPAEVSK.D           |
| N194  | Q32KV6     | K.FN*SSSSSLEEK.I                |
| N307  | F1MNJ2     | R.QLQDLDCSSSDDEGAAQN*STKPSATK.G |
| N46   | E1BPQ9     | R.FN*CTISQGWK.L                 |
| N1093 | F1MRA6     | K.NGTQ*LQN*FTLDR.N              |
| N109  | E1BLA8     | K.AVLVNN*ITTGER.L               |
| N295  | F1ML75     | R.LN*ISAVESK.F                  |
| N86   | F1MGC2     | R.TFAYVAGICNTPN*VTCSKPGR.M      |
| N225  | F1N2B5     | R.DVQNLTN*PSSFLAEWQN*ITK.S      |

**Table S10.** Phosphopeptides identified from milk tryptic digest after enrichment by TiPCM.

| Protein | Peptide sequence        | Variable modification         |
|---------|-------------------------|-------------------------------|
| P02662  | EDVPSER                 | Phospho (ST)                  |
| P02662  | EKVNELSK                | Phospho (ST)                  |
| P02662  | VPQLEIVPNSAEER          | Phospho (ST)                  |
| P02662  | DIGSESTEDQAMEDIK        | Phospho (ST)                  |
| P02662  | DIGSESTEDQAMEDIK        | Oxidation (M); Phospho (ST)   |
| P02662  | DIGSESTEDQAMEDIK        | 2 Phospho (ST)                |
| P02662  | DIGSESTEDQAMEDIK        | Oxidation (M); 2 Phospho (ST) |
| P02662  | YKVPQLEIVPNSAEER        | Phospho (ST)                  |
| P02662  | DIGSESTEDQAMEDIK        | 3 Phospho (ST)                |
| P02662  | DIGSESTEDQAMEDIK        | Oxidation (M); 3 Phospho (ST) |
| P02662  | QMEAESISSSEEIVPNSVEQK   | 2 Phospho (ST)                |
| P02662  | QMEAESISSSEEIVPNSVEQK   | 3 Phospho (ST)                |
| P02662  | QMEAESISSSEEIVPNSVEQK   | 4 Phospho (ST)                |
| P02666  | FQSEEQQQTEDELQDK        | Phospho (ST)                  |
| P02666  | FQSEEQQQTEDELQDK        | 2 Phospho (ST)                |
| P02666  | IEKFQSEEQQQTEDELQDK     | Phospho (ST)                  |
| P02666  | ELEELNVPGEIVESLSSEESITR | Phospho (ST)                  |
| P02666  | ELEELNVPGEIVESLSSEESITR | 2 Phospho (ST)                |

|        |                             |                               |
|--------|-----------------------------|-------------------------------|
| P02666 | ELEELNVPGEIVESLSSEESITR     | 3 Phospho (ST)                |
| P02666 | ELEELNVPGEIVESLSSEESITR     | 4 Phospho (ST)                |
| P02666 | ELEELNVPGEIVESLSSEESITR     | 5 Phospho (ST)                |
| P02663 | NMAINPSK                    | Phospho (ST)                  |
| P02663 | NMAINPSK                    | Oxidation (M); Phospho (ST)   |
| P02663 | EQLSTSEENSK                 | Phospho (ST)                  |
| P02663 | EQLSTSEENSK                 | 2 Phospho (ST)                |
| P02663 | EQLSTSEENSKK                | Phospho (ST)                  |
| P02663 | TVDMESTEVFTK                | Phospho (ST)                  |
| P02663 | TVDMESTEVFTK                | Oxidation (M); Phospho (ST)   |
| P02663 | EQLSTSEENSK                 | 3 Phospho (ST)                |
| P02663 | EQLSTSEENSKK                | 2 Phospho (ST)                |
| P02663 | TVDMESTEVFTK                | Oxidation (M); 2 Phospho (ST) |
| P02663 | KTVDMESTEVFTK               | Phospho (ST)                  |
| P02663 | TVDMESTEVFTKK               | Phospho (ST)                  |
| P02663 | EQLSTSEENSKK                | 3 Phospho (ST)                |
| P02663 | NMAINPSKENLCSSTFCK          | Phospho (ST)                  |
| P02663 | NTMEHVSSEESIISQETYK         | 3 Phospho (ST)                |
| P02663 | NTMEHVSSEESIISQETYK         | 3 Phospho (ST); Phospho (Y)   |
| P02663 | NTMEHVSSEESIISQETYK         | 4 Phospho (ST)                |
| P02663 | NANEEEEYSIGSSSEESAEVATEEVK  | 3 Phospho (ST)                |
| P02663 | NANEEEEYSIGSSSEESAEVATEEVK  | 4 Phospho (ST)                |
| P02663 | NANEEEEYSIGSSSEESAEVATEEVK  | 3 Phospho (ST); Phospho (Y)   |
| P02663 | NANEEEEYSIGSSSEESAEVATEEVK  | 4 Phospho (ST); Phospho (Y)   |
| P02663 | NANEEEEYSIGSSSEESAEVATEEVK  | 5 Phospho (ST)                |
| P02663 | NANEEEEYSIGSSSEESAEVATEEVK  | 5 Phospho (ST); Phospho (Y)   |
| F1MI46 | QNTLPSK                     | Phospho (ST)                  |
| F1MI46 | ETNSSELSK                   | Phospho (ST)                  |
| F1MI46 | TSQLTDHDK                   | Phospho (ST)                  |
| F1MI46 | HSNLIESQENSK                | Phospho (ST)                  |
| F1MI46 | ISHELDSASSEVN               | Phospho (ST)                  |
| F1MI46 | ISHELDSASSEVN               | 2 Phospho (ST)                |
| F1MI46 | ISHELDSASSEVN               | 3 Phospho (ST)                |
| F1MI46 | IRISHELDSASSEVN             | 3 Phospho (ST)                |
| F1MI46 | TSQLTDHDKETNSSELSK          | 3 Phospho (ST)                |
| F1MI46 | QTFLAPQNSVSSEETDDNK         | 3 Phospho (ST)                |
| F1MI46 | SNVQSPDATEEDFTSHIESEEMHDAPK | 2 Phospho (ST)                |
| P31098 | QNTLPSK                     | Phospho (ST)                  |
| P31098 | HSNLIESQENSK                | Phospho (ST)                  |
| P31098 | ISHELDSASSEVN               | Phospho (ST)                  |
| P31098 | ISHELDSASSEVN               | 2 Phospho (ST)                |
| P31098 | ISHELDSASSEVN               | 3 Phospho (ST)                |
| P31098 | IRISHELDSASSEVN             | 3 Phospho (ST)                |

|        |                                                  |                                 |
|--------|--------------------------------------------------|---------------------------------|
| P31098 | QTFLAPQNSVSSEETDDNK                              | 3 Phospho (ST)                  |
| Q58DM6 | QNTLPSK                                          | Phospho (ST)                    |
| Q58DM6 | QTFLAPQNSVSSEETDDNK                              | 3 Phospho (ST)                  |
| P80195 | NLQISNEDLSK                                      | Phospho (ST)                    |
| P80195 | NLQISNEDLSK                                      | 2 Phospho (ST)                  |
| P80195 | EPSISREDLISK                                     | 2 Phospho (ST)                  |
| P80195 | EPSISREDLISK                                     | 3 Phospho (ST)                  |
| P80195 | NLQISNEDLSKEPSISR                                | 2 Phospho (ST)                  |
| P80195 | NLQISNEDLSKEPSISR                                | 3 Phospho (ST)                  |
| P80195 | NLQISNEDLSKEPSISR                                | 4 Phospho (ST)                  |
| P80195 | NLQISNEDLSKEPSISREDLISK                          | 3 Phospho (ST)                  |
| P80195 | NLQISNEDLSKEPSISREDLISK                          | 4 Phospho (ST)                  |
| P80195 | NLQISNEDLSKEPSISREDLISK                          | 5 Phospho (ST)                  |
| B0JYN6 | CDSSPDSAEDVR                                     | Phospho (ST)                    |
| E1BC95 | HSGALDTK                                         | Phospho (ST)                    |
| Q2TA12 | AGDTILNSDHIGRMAVAAREGDAHPLGALP<br>VGTLINNVSESEPR | Oxidation (M); Phospho (ST)     |
| G3N1L4 | DTPKGAGRAAPPISSATTPR                             | 2 Phospho (ST)                  |
| P02662 | VNELSKDIGSESTEDQAMEDIK                           | 2 Phospho (ST)                  |
| P02663 | TVDMESTEVFTK                                     | 2 Phospho (ST)                  |
| P02663 | TVDMESTEVFTKK                                    | Oxidation (M); Phospho (ST)     |
| P02663 | KTVDMESTEVFTK                                    | Oxidation (M); Phospho (ST)     |
| P02663 | NTMEHVSSEESIISQETYK                              | Oxidation (M); 4 Phospho (ST)   |
| P02663 | NANEEYSIGSSSEESAEVATEEVK                         | 6 Phospho (ST)                  |
| F1MI46 | TSQLTDHSKETNSSELSK                               | 2 Phospho (ST)                  |
| F1MI46 | SNVQSPDATEEDFTSHIESEMHDAPK                       | Oxidation (M); 2 Phospho (ST)   |
| P80025 | TTLSSEAPTTQQLSEYFK                               | Phospho (ST)                    |
| E1BK64 | TVTAAGAENIQKKTDEK                                | 3 Phospho (ST)                  |
| A5PJK3 | SDSFYSSSASMYMPPPSADMGTGMYGMQTCG<br>LLPSLAKR      | 6 Phospho (ST); 2 Phospho (Y)   |
| Q0V8M0 | KTCMYRSEQEELQDK                                  | Phospho (ST); Phospho (Y)       |
| Q0V8M0 | KTCMYRSEQEELQDK                                  | 2 Phospho (ST); Phospho (Y)     |
| Q0V8R5 | QAGGSTVK                                         | Phospho (ST)                    |
| E1BNK2 | RGRSTVTK                                         | Phospho (ST)                    |
| E1B9Z9 | MPTSSHATRRTTAGLTVPEVMASPTPWATS<br>RVTSQPADR      | Oxidation (M); 10 Phospho (ST)  |
| A6QPR4 | FMTVGQVSARSSK                                    | Oxidation (M); 2 Phospho (ST)   |
| A1A4R9 | SNSNAVSAIPINK                                    | Phospho (ST)                    |
| F1MRQ2 | SPSMPFLGEPLMEK                                   | 2 Oxidation (M); 2 Phospho (ST) |
| E1BQ34 | GNSGSLPEGPGR                                     | Phospho (ST)                    |

|        |                                       |                                          |
|--------|---------------------------------------|------------------------------------------|
| F1MER1 | KAQNGMENG DAGSEK                      | Oxidation (M); Phospho (ST)              |
| Q0V8L2 | LQRLPSSSSEMGSQDGSPLR                  | Oxidation (M); 5 Phospho (ST)            |
| P02662 | QMEAESISSSEEIVPNSVEQK                 | 5 Phospho (ST)                           |
| P02662 | QMEAESISSSEEIVPNSVEQK                 | Oxidation (M); 5 Phospho (ST)            |
| P00760 | DSCQGDSGGPVVCSGK                      | Phospho (ST)                             |
| P02663 | NTMEHVSSEESIISQETYK                   | 5 Phospho (ST)                           |
| F1N0Q2 | DKLNEISK                              | Phospho (ST)                             |
| F1MTE8 | EKITSDENSNEK                          | Phospho (ST)                             |
| F1MTE8 | EKITSDENSNEK                          | 2 Phospho (ST)                           |
| A5D973 | DCEAEVRAAASHK                         | Phospho (ST)                             |
| Q0VD52 | ETHSHLSSEVTK                          | Phospho (ST)                             |
| F1MY54 | GAGITRKK                              | Phospho (ST)                             |
| F1MLY7 | KPIYLSK                               | Phospho (Y)                              |
| F1MLY7 | KPIYLSK                               | Phospho (ST); Phospho (Y)                |
| G3N1X7 | TPEALLQVGGLRADQR                      | Phospho (ST)                             |
| A8E4P2 | KGGYAIK                               | Phospho (Y)                              |
| G3N1K9 | SSSLMVK                               | Phospho (ST)                             |
| F1MKY5 | KAISFGGCLTQIFFIHDIGGTEMVLLIAMAF<br>DR | 2 Oxidation (M); 2 Phospho (ST)          |
| F1MNM6 | SNLSALEHK                             | Phospho (ST)                             |
| F1MSL9 | MYLSGYGVELAIK                         | Oxidation (M); Phospho (ST); Phospho (Y) |
| F1MME5 | MSLPKSSIADNSGIQMK                     | Phospho (ST)                             |
